# Supplementary material
Source: PubMed Central journal article supplement (PMC4638418)
Supplement: NIHMS724023-supplement-Supplementary_Figures_1-4.pdf [file NIHMS724023-supplement-Supplementary_Figures_1-4.pdf]

### Random Forest Confusion Matrix

#### Predicted Group

| Actual Group              | II  | III | IV | Class Error |      |
|---------------------------|-----|-----|----|-------------|------|
|                           | II  | 14  | 4  | 0           | 0.22 |
|                           | III | 5   | 6  | 7           | 0.67 |
|                           | IV  | 2   | 2  | 29          | 0.12 |
| Predictive accuracy = 71% |     |     |    |             |      |

Figure S1

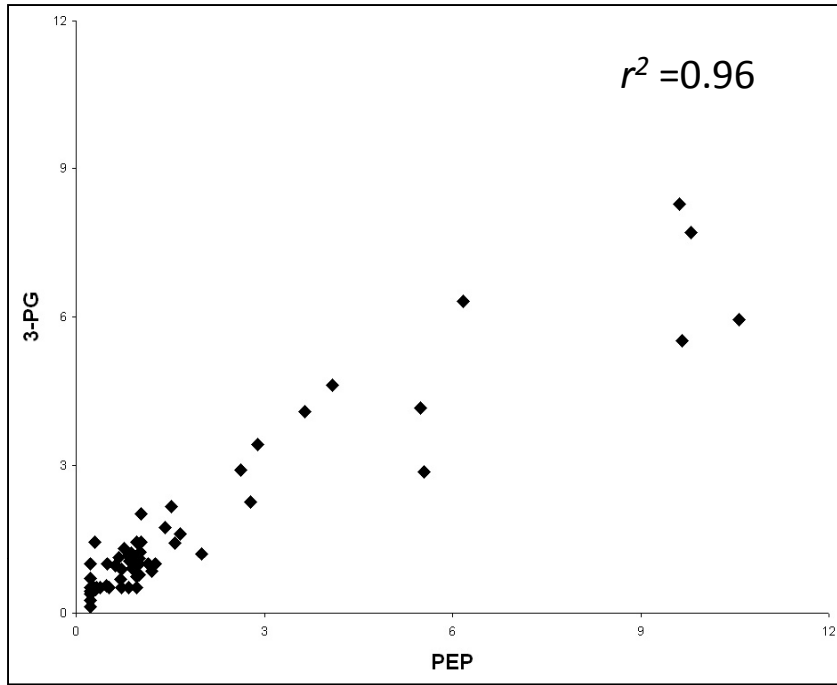

Figure S2

*mes*

*PR*

*PN*

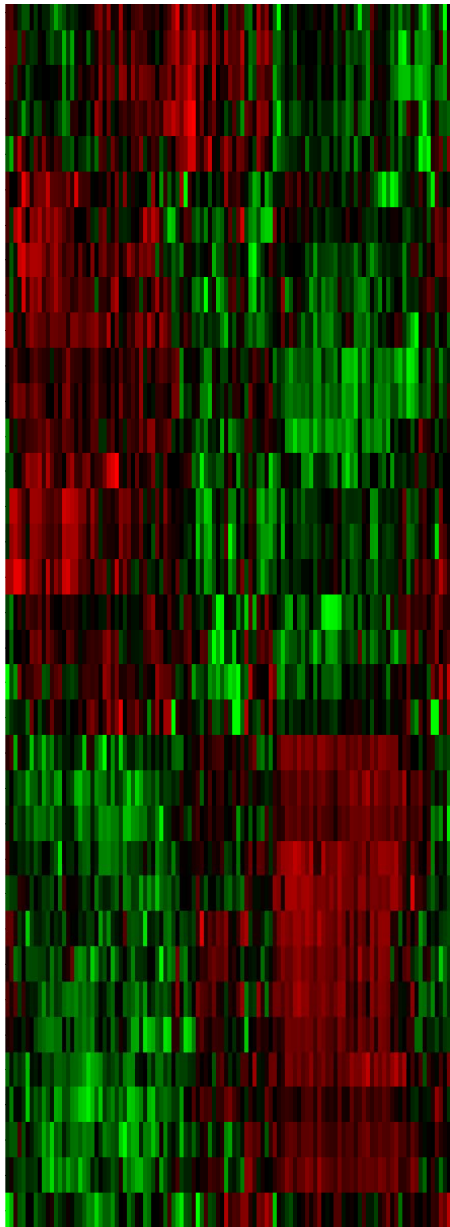

Figure S3

# Principal Component Analysis (PCA) on 3 metabolomic profiles

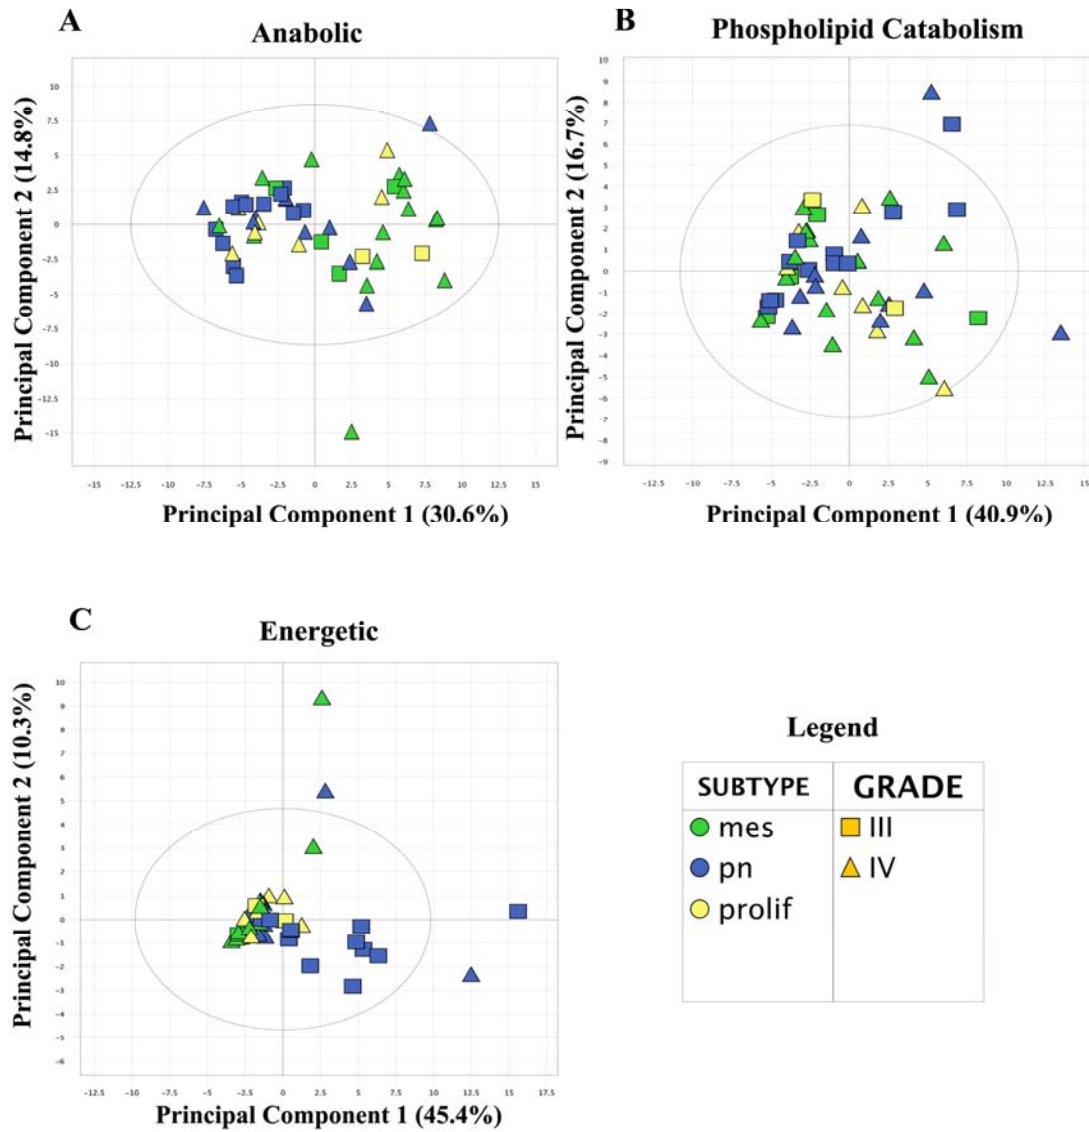

Figure S4
