# Supplementary material
Source: PubMed Central journal article supplement (PMC4638418)
Supplement: NIHMS724023-supplement-Supplementary_Tables_1-2.pdf [file NIHMS724023-supplement-Supplementary_Tables_1-2.pdf]

|                             | <b>Total</b> |
|-----------------------------|--------------|
| <b>Grade II</b>             |              |
| Astrocytoma                 | 9            |
| Oligodendroglioma/mixed     | 9            |
| <b>Grade III</b>            |              |
| Anaplastic Astrocytoma      | 10           |
| Anaplastic Oligoastrocytoma | 8            |
| <b>Grade IV</b>             |              |
| Glioblastoma                | 28           |
| Giant Cell                  | 1            |
| Gliosarcoma                 | 4            |

Table S1

Table S2

"Anabolic"

|                                        |
|----------------------------------------|
| 1-stearoylglycerophosphoethanolamine   |
| 2-aminoacidate                         |
| 2-aminobutyrate                        |
| 2-hydroxyppalmitate                    |
| 3-aminoisobutyrate                     |
| <b>3-phosphoglycerate</b>              |
| 5-6-dihydrouracil                      |
| <b>6-phosphogluconate</b>              |
| 7-alpha-hydroxy-3-oxo-4-cholestenolate |
| acetyl carnitine                       |
| adrenate (22:4n6)                      |
| alanine                                |
| alpha-tocopherol                       |
| asparagine                             |
| beta-alanine                           |
| butyrylcarnitine                       |
| carnitine                              |
| cysteine sulfenic acid                 |
| deoxycarnitine                         |
| docosahexaenolate                      |
| docosapentaenolate                     |
| docosapentaenolate                     |
| eicosenolate                           |
| fumarate                               |
| gluconate                              |
| <b>glycine</b>                         |
| glycylglycine                          |
| hexanoylcarnitine                      |
| hypotaurine                            |
| kynurenine                             |
| leucine                                |
| linoleate                              |
| lysine                                 |
| maltose                                |
| margarate                              |
| methyl palmitate                       |
| myristoleate                           |
| N-acetylglucosamine 6-phosphate        |
| N-acetylglycine                        |
| ornithine                              |
| palmitate                              |
| phenylacetylglutamine                  |
| phenylalanine                          |
| <b>phosphoenolpyruvate (PEP)</b>       |
| phosphoethanolamine                    |
| proline                                |
| propionylcarnitine                     |
| <b>serine</b>                          |
| threonine                              |
| tiglyl carnitine                       |
| trans-4-hydroxyproline                 |
| tryptophan                             |
| tyrosine                               |
| uracil                                 |
| urate                                  |

"Energetic"

|                                  |
|----------------------------------|
| 3-(4-hydroxyphenyl)lactate       |
| 1,3-dihydroxyacetone             |
| 3-phosphoserine                  |
| 4-acetamidobutanoate             |
| 7-alpha-hydroxycholesterol       |
| allo-threonine                   |
| arabinose                        |
| arabitol                         |
| arabonate                        |
| cystathionine                    |
| dehydroascorbate                 |
| dihydroxyacetone phosphate       |
| erythronate                      |
| fructose 1-phosphate             |
| <b>fructose-6-phosphate</b>      |
| <b>glucose-6-phosphate (G6P)</b> |
| glycerol 3-phosphate (G3P)       |
| glycerophosphoethanolamine       |
| glycerophosphorylcholine (GPC)   |
| homocarnosine                    |
| mannose-6-phosphate              |
| myo-inositol                     |
| scyllo-inositol                  |
| sedoheptulose-7-phosphate        |
| sorbitol                         |
| spermidine                       |
| succinylcarnitine                |
| xylonate                         |

"Phospholipid Catabolism"

|                                          |
|------------------------------------------|
| 1-myristoylglycerophosphocholine         |
| 1-oleoylglycerophosphocholine            |
| 1-oleoylglycerophosphoethanolamine       |
| 1-palmitoleoylglycerophosphocholine      |
| 1-palmitoylglycerophosphocholine         |
| 2-oleoylglycerophosphocholine            |
| 2-oleoylglycerophosphoethanolamine       |
| 2-palmitoleoylglycerophosphocholine      |
| 2-palmitoleoylglycerophosphoethanolamine |
| 2-palmitoylglycerophosphocholine         |
| 2-palmitoylglycerophosphoethanolamine    |
| cholesterol                              |
| cis-vaccenate                            |
| dimethylallyl pyrophosphate              |
| docosatrienolate                         |
| mead acid                                |
| methylphosphate                          |
| palmitoyl ethanolamide                   |
| sphinganine                              |
| sphingosine                              |
| stearoylcarnitine                        |
| valeryl carnitine                        |
